# Supplementary material for: GOX-hemin nanogels with enhanced cascade activity for sensitive one-step glucose detection
Source: Royal Society of Chemistry journal article supplement (doi:10.1039/d1tb00191d), 2021-01-01
Supplement: d1tb00191d1.pdf [file d1tb00191d1.pdf]

## Supporting Information

### GOX-Hemin Nanogels with Enhanced Cascade Activity for Sensitive

### One-Step Glucose Detection

Xiaotong Fan,<sup>a</sup> Jiawei Lim,<sup>a</sup> Zibiao Li,<sup>b</sup> Tingting Wang,<sup>c</sup> Lu Jiang,<sup>b</sup> Siqi Liu,<sup>a</sup> Lili Zhou,<sup>a</sup> Chaobin He<sup>a,b,\*</sup>

a. Department of Materials Science and Engineering, National University of Singapore, 9 Engineering Drive 1, Singapore 117576, Singapore. Email: msehc@nus.edu.sg

b. Institute of Materials Research and Engineering, Agency for Science, Technology, and Research (A\*STAR), 2 Fusionopolis Way, Innovis, Singapore 138634, Singapore.

c. Department of Biomedical Engineering, National University of Singapore, 7 Engineering Drive 1, Singapore 117574, Singapore.

\*Address correspondence to: msehc@nus.edu.sg

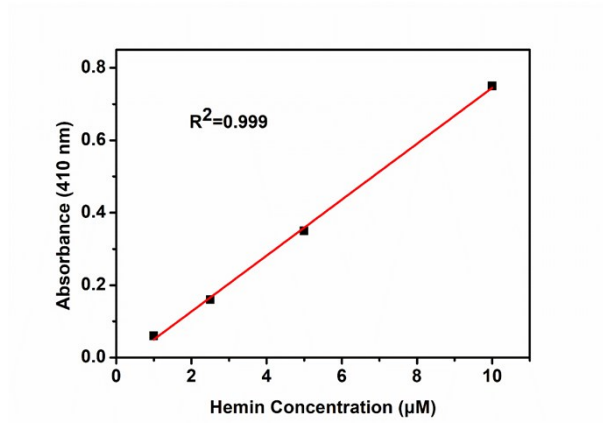

**Fig. S1** The standard curve of hemin in DMSO.

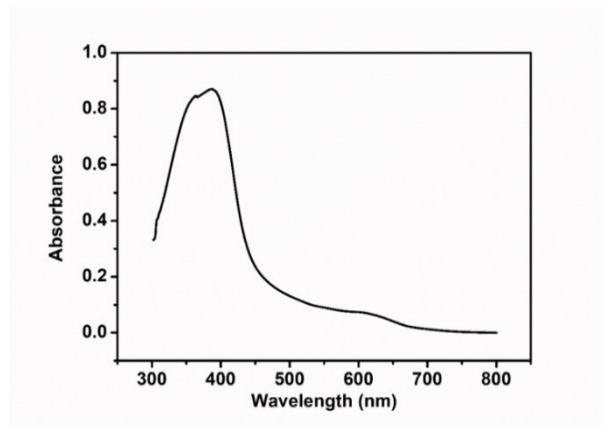

**Fig. S2** The absorbance spectrum of GHN in PBS solution (1.1 μM hemin equivalent)

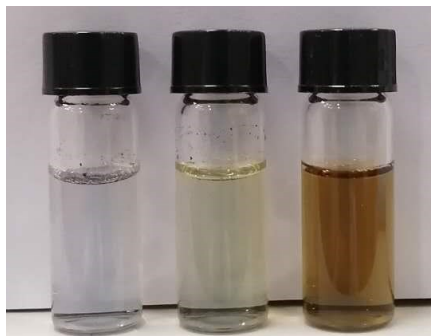

**Fig. S3** The image of the sample solution from left to right is the aqueous solution of hemin, mixture of hemin and GOX, and GHN, indicating after hemin was polymerized onto GOX, it became soluble in aqueous solution.

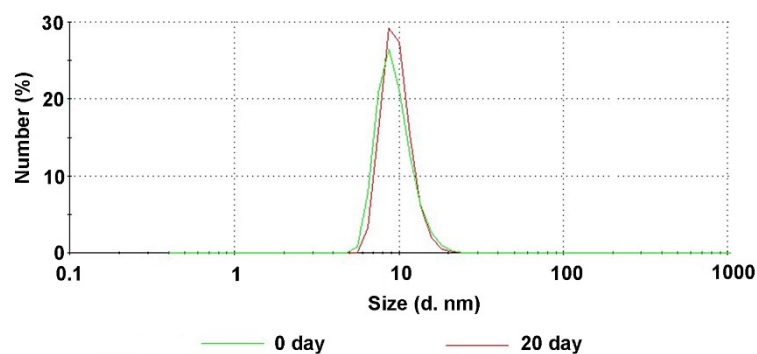

**Fig. S4** Detecting the size stability of the GHN at room temperature. The size of the prepared GHN was almost unchanged after kept at room temperature for 20 days.

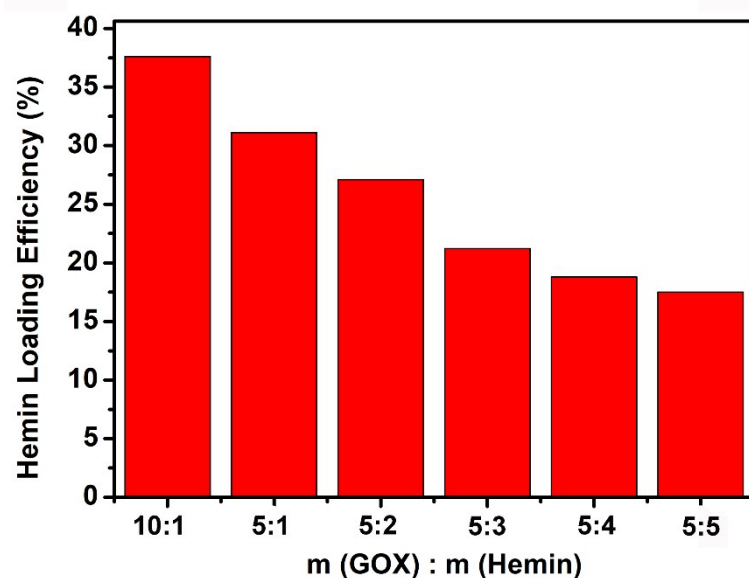

**Fig. S5** Hemin loading efficiency for preparing GHN at different GOX/Hemin ratios.

**Table S1** Kinetic parameters for the peroxidase like activity of GOX-hemin nanogel (GHN), and GOX activity of GOX-porphyrin nanogel (GPN) and native GOX.

| Catalyst | Substrate              | $K_m$<br>(mM) | $k_{cat}$<br>( $\text{min}^{-1}$ ) | $K_M/k_{cat}$<br>( $\text{M}^{-1}\text{min}^{-1}$ ) |
|----------|------------------------|---------------|------------------------------------|-----------------------------------------------------|
| GHN      | $\text{H}_2\text{O}_2$ | 12.52         | 8.1                                | 650                                                 |
| GOX      | glucose                | 8.97          | 15722                              | $1.75 \times 10^6$                                  |
| GPN      | glucose                | 13.62         | 21813                              | $1.60 \times 10^6$                                  |

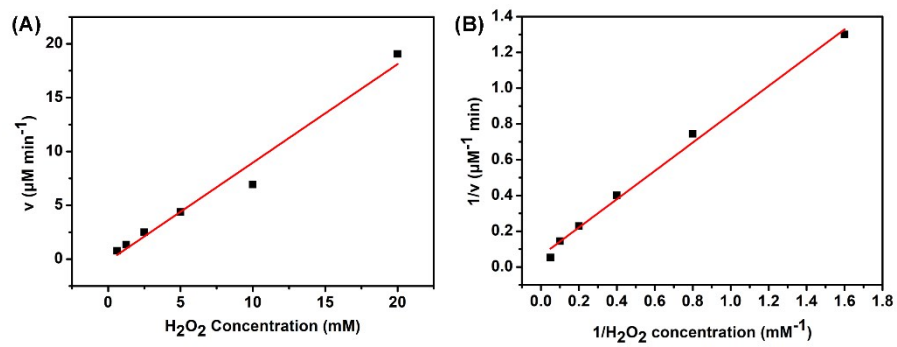

**Fig. S6** Steady-state kinetic assays for the peroxidase like activity of GHN. (A) Michaelis-Menten and (B) Lineweaver-Burk plots for the H<sub>2</sub>O<sub>2</sub> substrate.

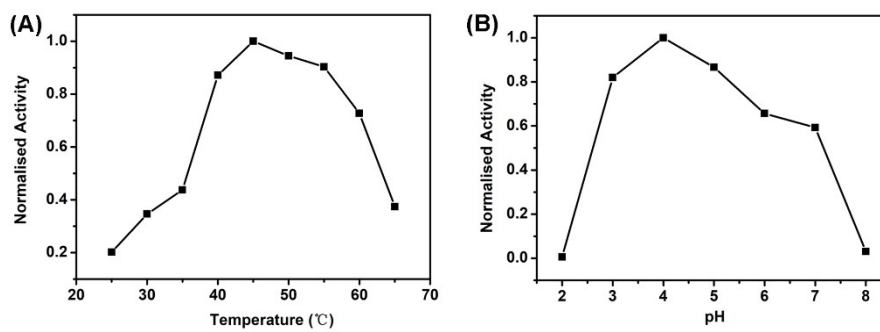

**Fig. S7** The optimal (A) temperature and (B) pH for the peroxidase like activity of GHN.

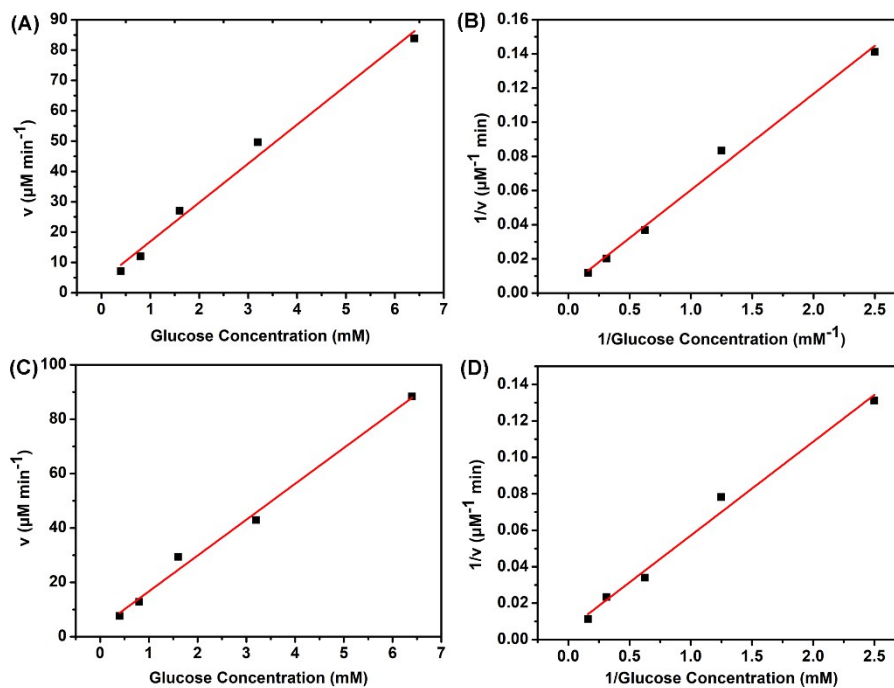

**Fig. S8** Steady-state kinetic assays for the GOX activity of GPN and GOX. (A) Michaelis–Menten and (B) Lineweaver-Burk plots for the GOX activity of GPN. (C) Michaelis–Menten and (D) Lineweaver-Burk plots for GOX.

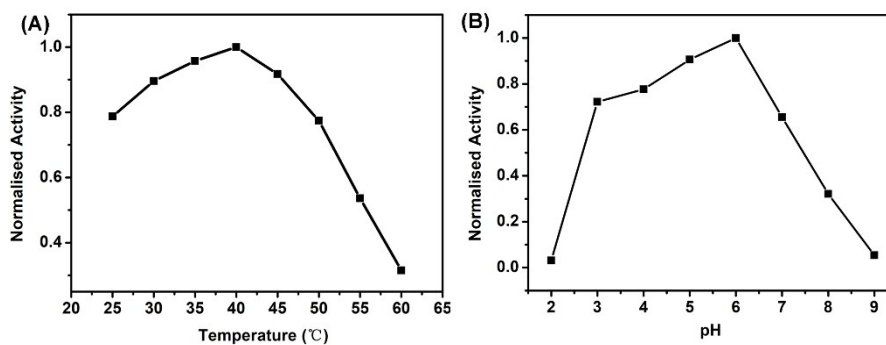

**Fig. S9** The optimal (A) temperature and (B) pH for the GOX activity of GPN.

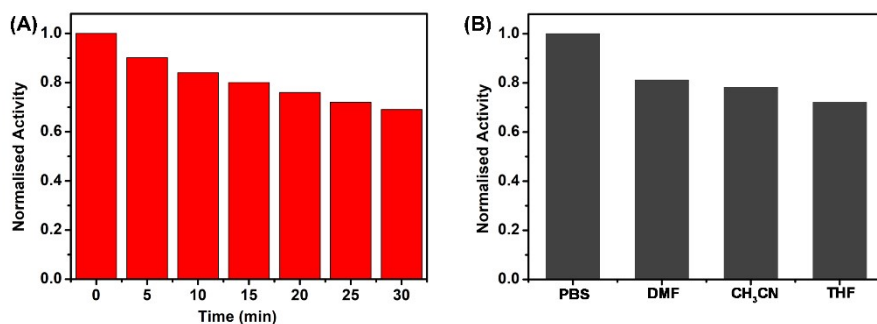

**Fig. S10** (A) Relative glucose detection activity of GHN after being incubated at 55  $^{\circ}\text{C}$  for 0 to

30 min. (B) Relative glucose detection activity of GHN after being incubated for 25 min at room temperature in 20% (v/v) aqueous solution of DMF, CH<sub>3</sub>CN and THF (Incubation in PBS as a control).

**Table S2 Comparison of the limitation of determination (LOD) for glucose on basis of different materials**

| Materials                               | LOD ( $\mu$ M) | Method      | Reference |
|-----------------------------------------|----------------|-------------|-----------|
| Fe <sub>3</sub> O <sub>4</sub>          | 30             | colorimetry | 1         |
| Co <sub>3</sub> O <sub>4</sub> NPs      | 5              | colorimetry | 2         |
| BSA-Cu NCs                              | 100            | colorimetry | 3         |
| CeO <sub>2</sub> /NT-TiO <sub>2</sub>   | 6.1            | colorimetry | 4         |
| Graphene Oxide                          | 1              | colorimetry | 5         |
| V <sub>2</sub> O <sub>5</sub> nanozymes | 10             | colorimetry | 6         |
| GOX/Hemin nanogel                       | 4              | colorimetry | This work |

## References

1. H. Wei and E. Wang, *Anal. Chem.*, 2008, **80**, 2250-2254.
2. H. Jia, D. Yang, X. Han, J. Cai, H. Liu and W. He, *Nanoscale*, 2016, **8**, 5938-5945.
3. L. Hu, Y. Yuan, L. Zhang, J. Zhao, S. Majeed and G. Xu, *Anal. Chim. Acta*, 2013, **762**, 83-86.
4. H. Zhao, Y. Dong, P. Jiang, G. Wang and J. Zhang, *ACS Appl. Mat. Interfaces*, 2015, **7**, 6451-6461.
5. Y. Song, K. Qu, C. Zhao, J. Ren and X. Qu, *Adv. Mater.*, 2010, **22**, 2206-2210.
6. J. H. Sun, C. Y. Li, Y. F. Qi, S. L. Guo and X. Liang, *Sensors* 2016, **16**, 584.
